# Supplementary material
Source: PubMed Central journal article supplement (PMC5843470)
Supplement: NIHMS882754-supplement-SI1.pdf [file NIHMS882754-supplement-SI1.pdf]

## Supporting Information

# Comparative study of multicellular tumor spheroid formation methods and implications for drug screening

Maria F. Gencoglu<sup>‡</sup>, Lauren E. Barney<sup>‡</sup>, Christopher L. Hall<sup>‡</sup>, Elizabeth A. Brooks<sup>‡</sup>, Alyssa D. Schwartz<sup>‡</sup>, Daniel C. Corbett<sup>§</sup>, Kelly R. Stevens<sup>§</sup> and Shelly R. Peyton<sup>\*‡</sup>

<sup>‡</sup>: Department of Chemical Engineering, University of Massachusetts Amherst, N540 Life Sciences Laboratories, 240 Thatcher Rd, Amherst, MA 01003-9364.

<sup>§</sup>: Department of Bioengineering, University of Washington, Box 355061, Seattle, WA, 98195-5061.

\*Corresponding author: [speyton@ecs.umass.edu](mailto:speyton@ecs.umass.edu)

**15 pages, 2 tables, 11 figures**

## Materials and Methods:

### RGD synthesis

GRGDSPCG was synthesized on a CEM's Liberty Blue automated solid phase peptide synthesizer (CEM, Matthews, NC) using Fmoc protected amino acids (Peptide Solutions LLC, Las Vegas, NV). Resin was cleaved from the peptide by sparging nitrogen gas through a solution of peptide-resin and trifluoroacetic acid, triisopropylsilane, water, 2,2'-(Ethylenedioxy)diethanethiol at a ratio of 92.5:2.5:2.5:2.5 % by volume, respectively (Sigma-Aldrich, St. Louis, MO) for 3 hours at room temperature in a peptide synthesis vessel (ChemGlass, Vineland, NJ). The peptide solution was filtered to remove the cleaved resin, and the peptide was precipitated out using dimethyl ether at -80 °C (Thermo Fisher Scientific, Waltham, MA). Molecular mass was validated using a MicroFlex MALDI-TOF (Bruker, Billerica, MA) using  $\alpha$ -cyano-4-hydroxycinnamic acid (Sigma-Aldrich, St. Louis, MO). Peptides were purified to  $\geq 95\%$  on a VYDAC reversed-phase c18 column attached to a Waters 2487 dual  $\lambda$  absorbance detector and 1525 binary HPLC pump (Waters, Milford, MA).

### Gene Expression Clustering and PCA

RT-PCR data was clustered using a heatmap in R programming to generate dendrograms. Principal component analysis employed the "Using the devtools" package and "factoextra R" library to calculate principal components 1 and 2, and the shaded ovals representing 0.5 probability are shown in Figure 2b. Gene set enrichment analysis (GSEA) was performed on RNA collected from MDA-MB-231 and SkBr3 cells on TCPS, from polyNIPAAM and from cells grown in polyNIPAAM for 14 days before being dissociated to single cells back onto TCPS for 24 hours. A ranked list was generated from these samples, and enrichment of gene sets was analyzed. Normalized enrichment scores are reported from this analysis. The accession number for the RNA-Seq data is GSE93562.

**Table S1: Characterization of gene expression by RT-PCR.**

| <b>Gene</b>    | <b>Accession #</b> | <b>Position</b> | <b>Forward sequence, 5'-3'</b> | <b>Position</b> | <b>Reverse sequence, 5'-3'</b> |
|----------------|--------------------|-----------------|--------------------------------|-----------------|--------------------------------|
| CLDN4          | NM_001305.4        | 678             | CAAGGCCAAGACCATGATCG           | 920             | GAGTAAGGCTTGTCTGTGCG           |
| CDH3           | NM_001793.5        | 11              | GGAGGTGGAGAAAGAGGCTT           | 223             | ACTCCTCAGCCTCCTCAGTA           |
| CDH5           | NM_001795.4        | 1075            | TACCAGGACGCTTTCACCAT           | 1298            | AAAGGCTGCTGGAAAATGGG           |
| ITGB4          | NM_000213.3        | 2946            | ACTACACCCTCACTGCAGAC           | 3154            | TCTGGCTTGCTCCTTGATGA           |
| ITGA2          | NM_002203.3        | 1784            | GGGCATTGAAAACACTCGAT           | 1966            | TCGGATCCCAAGATTTTCTG           |
| ITGB1          | NM_002211.3        | 2054            | CATCTGCGAGTGTGGTGTCT           | 2262            | GGGGTAATTTGTCCCGACTT           |
| FN1            | NM_212482.2        | 391             | CGGTGGCTGTCAGTCAAA             | 520             | AATCCTCGGCTTCCTCCATAA          |
| RPS-13         | NM_001017.2        | 217             | AAGTACGTTTTGTGACAGGCA          | 403             | CGGTGAATCCGGCTCTCTATTAG        |
| $\beta$ -actin | NM_001101.3        | 747             | GGACTTCGAGCAAGAGATGG           | 980             | AGCACTGTGTTGGCGTACAG           |

**Table S2: Pathology report of patient samples.**

| <b>Patient</b> | <b>Age</b> | <b>Diagnosis</b>                       | <b>Treatment</b>                                                           |
|----------------|------------|----------------------------------------|----------------------------------------------------------------------------|
| P1             |            | Malignant ascites                      | Cisplatin, and etoposide                                                   |
| P2             |            | Ovarian cancer with omental metastasis | None                                                                       |
| P3             | 76         | Uterine cancer and ascites             | Carboplatin, doxorubicin, and paclitaxel                                   |
| P4             | 66         | Papillary cancer, recurrent ascites    | Carboplatin, paclitaxel, doxorubicin liposomal, gemcitabine, and topotecan |
| P5             | 85         | Ovarian cancer, new ascites            | Carboplatin, and paclitaxel                                                |
| P6             | 60         | Cervical cancer and recurrent ascites  | Cisplatin, carboplatin, and paclitaxel                                     |

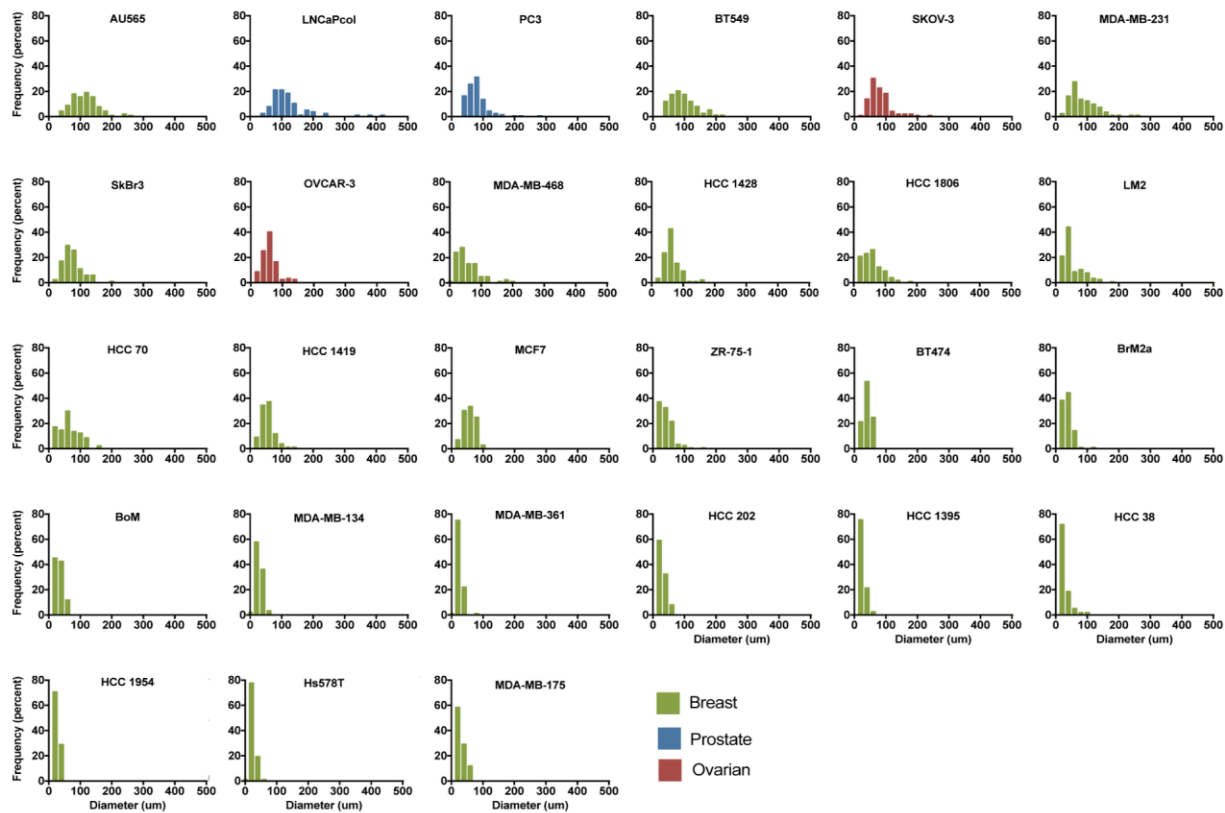

**Figure S1. MCTS size distribution in polyNIPAAM.**

Histograms of Day 14 diameters for MCTS formed in polyNIPAAM. Cell lines are ordered from the highest to the lowest mean diameter across 23 breast (green), 2 prostate (blue), and 2 ovarian (red) cancer cell lines.

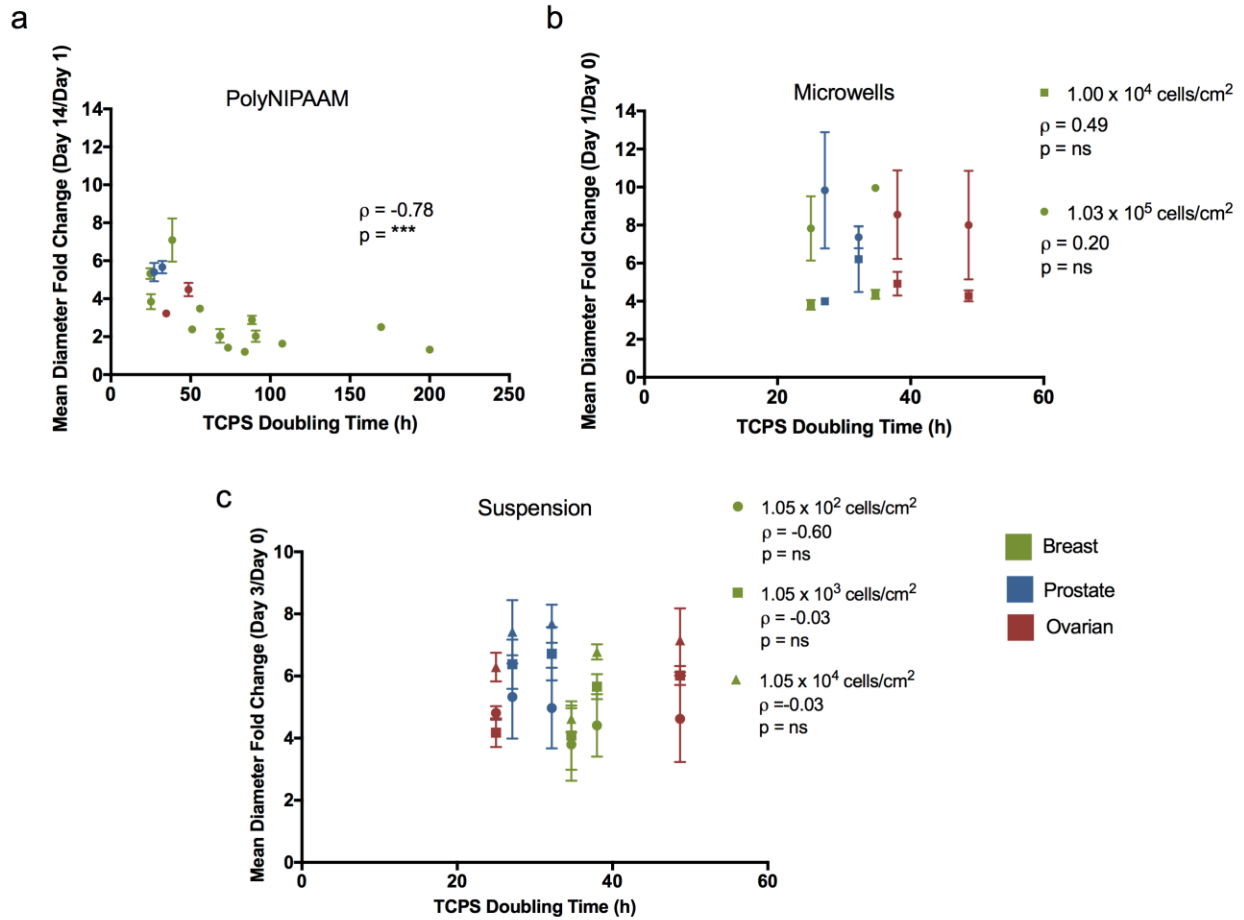

**Figure S2. PolyNIPAAAM MCTS size negatively correlated with TCPS doubling time.**

a. Mean diameter fold change in polyNIPAAAM vs. TCPS doubling time. b. Mean diameter fold change in microwells vs. TCPS doubling time. c. Mean diameter fold change in suspension vs. TCPS doubling time. Data for 13 breast (green), 2 prostate (blue), and 2 ovarian (red) cancer cell lines are shown. Mean diameter fold change measures how MCTS diameters changed from Day 1 to Day 14. Spearman rank correlation is reported as  $\rho$  with significance ( $p$ ) determined by a two-tailed t-test. Doubling times are from Heiser, *et al*<sup>46</sup>.

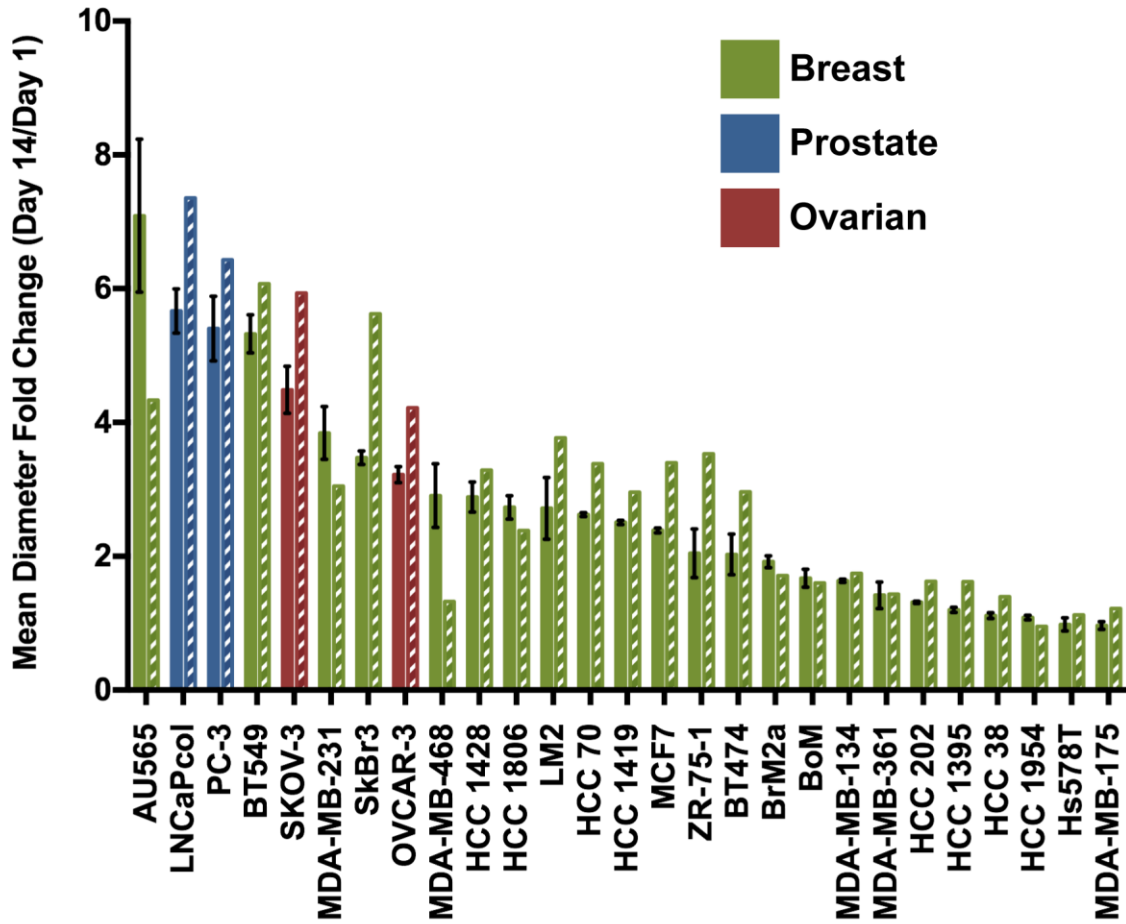

■ Routine culture medium    ▨ Routine culture medium + EGF

Figure S3. EGF affected MCTS size in polyNIPAAm.

Mean diameter fold change in polyNIPAAm of 23 breast (green), 2 prostate (blue), and 2 ovarian (red) cancer cell lines seeded with routine culture medium (solid bars) or routine culture medium + EGF (pattern bars). Mean diameter fold change measures how MCTS diameters changed from Day 1 to Day 14.

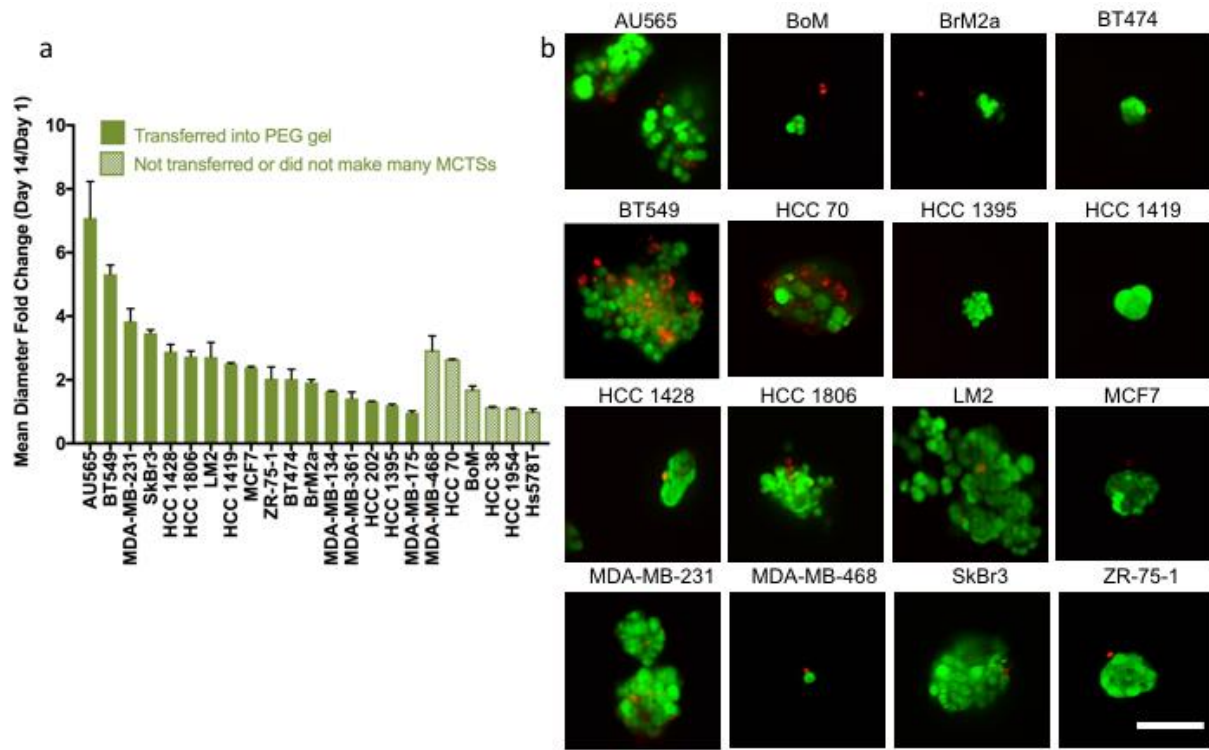

**Figure S4. Many breast cancer cell lines formed MCTS in polyNIPAAAM and could be transferred to 3D PEG-MAL hydrogel.**

a. Mean diameter fold change of 23 breast cancer cell lines grown into MCTS in polyNIPAAAM. Mean diameter fold change measures how MCTS diameters changed from Day 1 to Day 14. b. Live/dead images of MCTS (green: live cells, red: dead cells) in PEG-MAL hydrogels. Images taken 3 days post-encapsulation. Scale bar: 100  $\mu$ m.



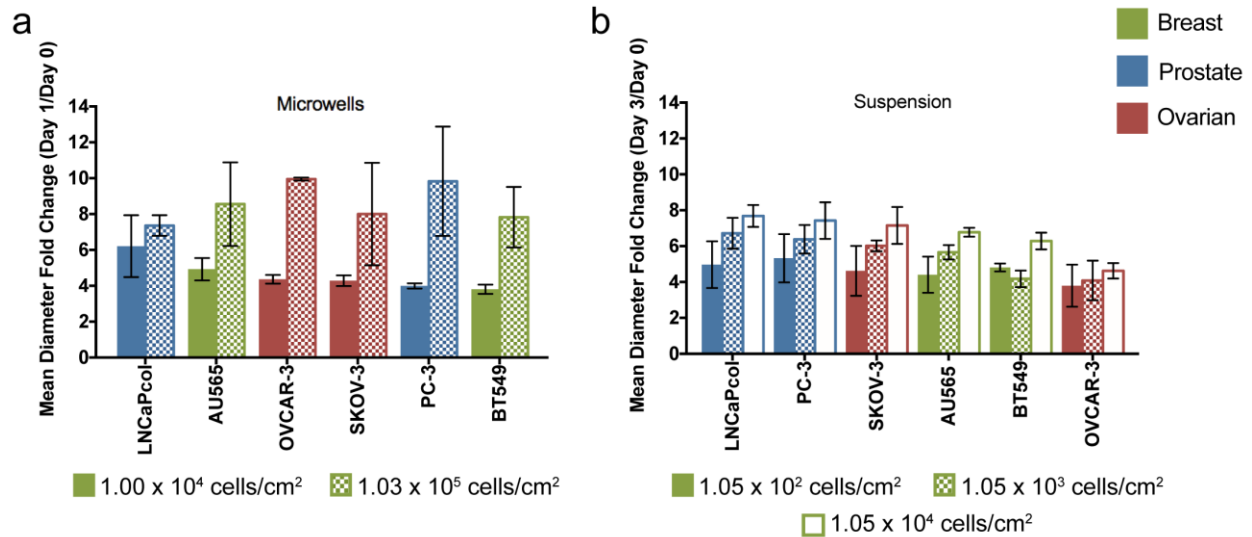

**Figure S5. MCTS size increased with seeding cell density in microwells and suspension.**

a. Effect of cell density on MCTS size in microwells (low density:  $1.00 \times 10^4$  cells/cm<sup>2</sup>-solid bars and high density:  $1.03 \times 10^5$  cells/cm<sup>2</sup>-pattern bars). b. Effect of cell density on MCTS size in suspension (low density:  $1.05 \times 10^2$  cells/cm<sup>2</sup>-solid bars, medium density:  $1.05 \times 10^3$  cells/cm<sup>2</sup>-pattern bars, and high density:  $1.05 \times 10^4$  cells/cm<sup>2</sup>-empty bars). Data for 2 breast (green), 2 prostate (blue), and 2 ovarian (red) cancer cell lines are shown. ANOVA with the Tukey post-test was applied to individual cell lines for each method. No statistically significant differences between seeding densities were observed in any cell line-method combination.

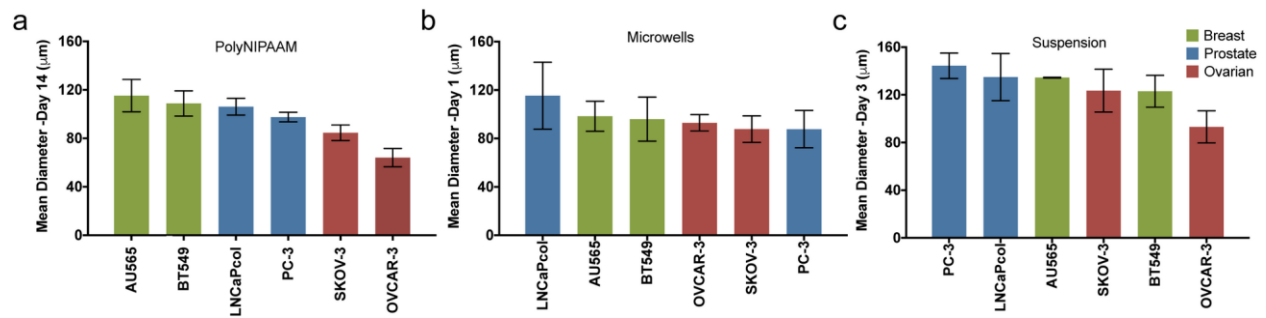

**Figure S6. MCTS reached sizes around 50-150 μm.**

a. Mean diameter in polyNIPAAAM at day 14 (density: 100 cells/μL). b. Mean diameter in microwells at day 1 (density:  $1.00 \times 10^4$  cells/cm<sup>2</sup>). c. Mean diameter in suspension at day 3 (density:  $1.05 \times 10^4$  cells/cm<sup>2</sup>). Data for 2 breast (green), 2 prostate (blue), and 2 ovarian (red) cancer cell lines are shown. ANOVA with Tukey post-test was used to compare statistically significant differences across methods for each cell line: PC-3 (polyNIPAAAM vs. suspension\*\*) and (microwells vs. suspension\*).

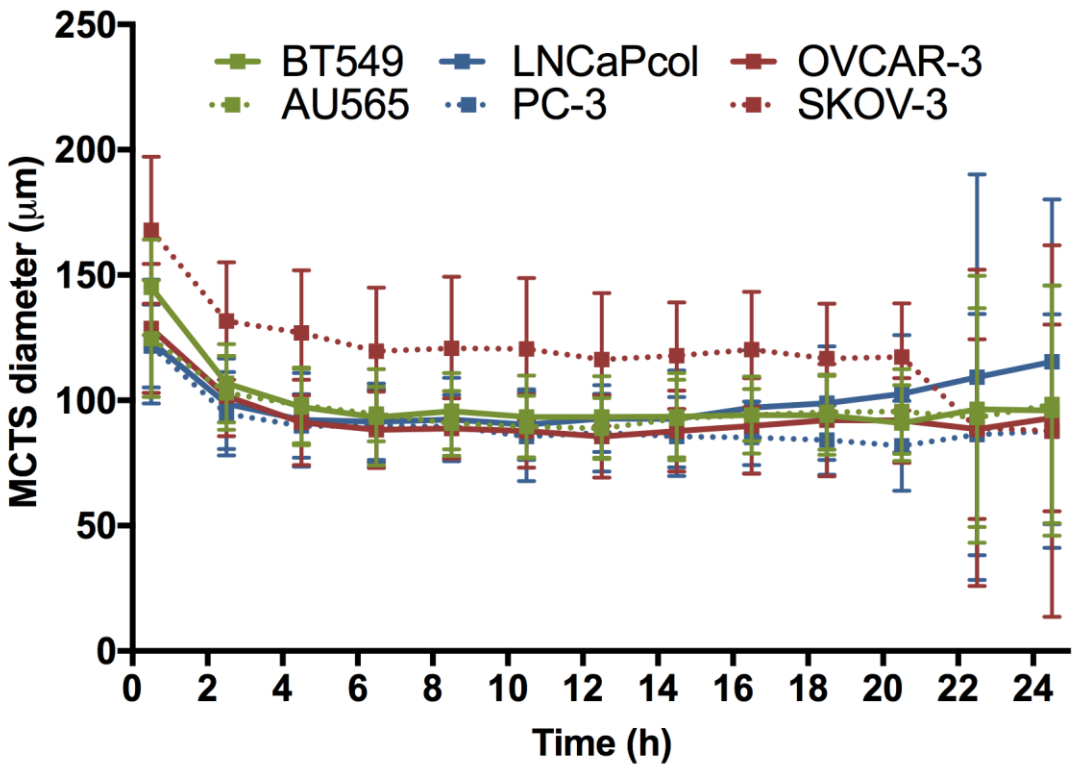

**Figure S7. MCTS became compact over time in microwells.**

MCTS diameter over time of 2 breast (AU565 and BT549, green), 2 prostate (LNCaPcol and PC-3, blue), and 2 ovarian (OVCAR-3 and SKOV-3, red) cancer cell lines for 24 hours after seeding in microwells.

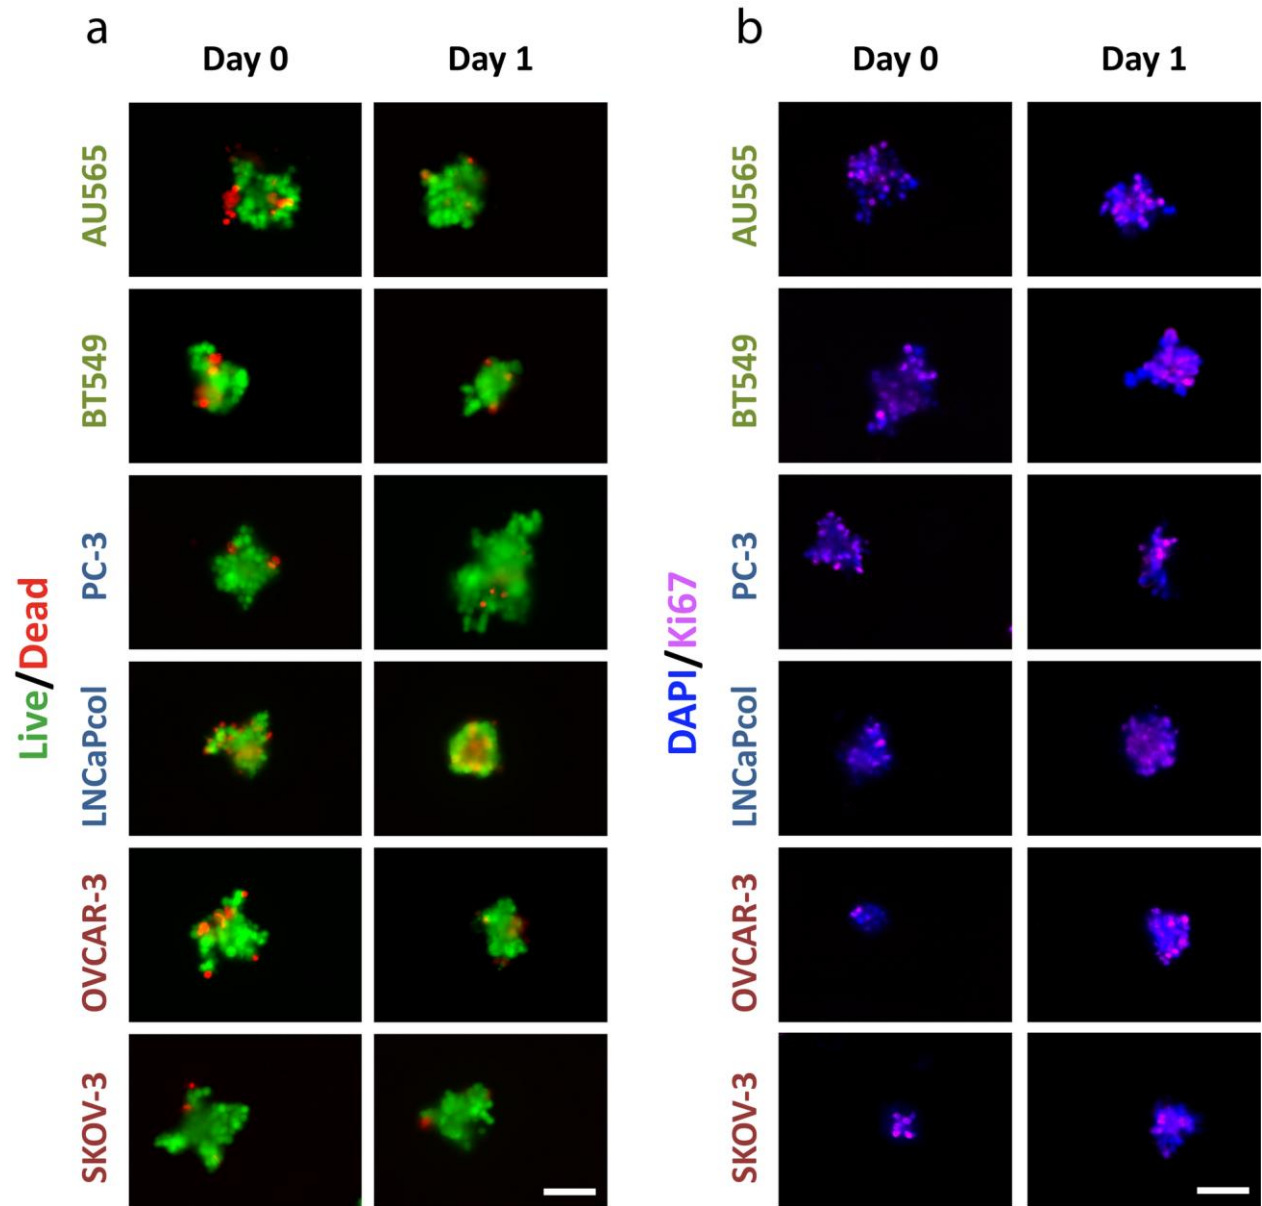

**Figure S8. MCTS proliferated in microwells.**

a. Live/dead staining of MCTS (green: live cells, red: dead cells). Scale bar: 100  $\mu\text{m}$ . b. Ki67 staining of MCTS (purple: Ki67, blue: DAPI). Images for 2 breast (green), 2 prostate (blue), and 2 ovarian (red) cancer cell lines are shown. Scale bar: 100  $\mu\text{m}$ .

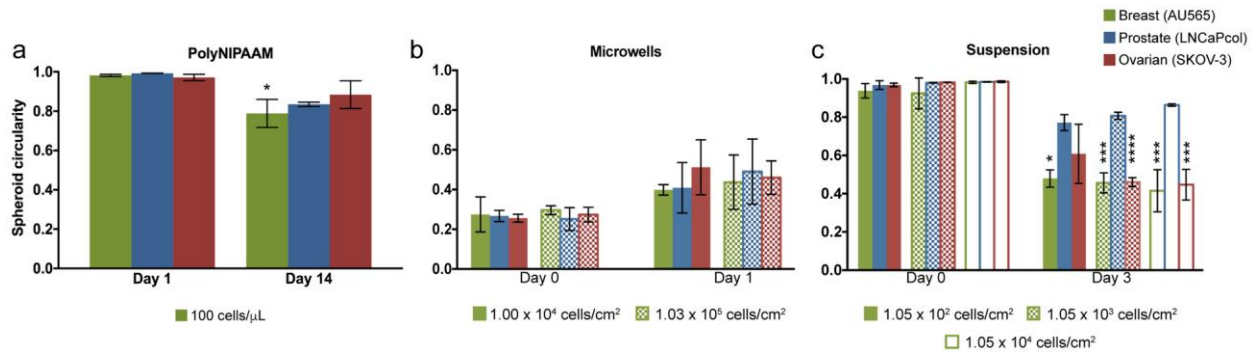

**Figure S9. Circularity was preserved in polyNIPAAM, increased in microwells, and decreased in suspension.**

a. MCTS circularity in polyNIPAAM (from Day 1 to Day 14). b. MCTS circularity in microwells (from Day 0 to Day 1). Low density:  $1.00 \times 10^4$  cells/cm<sup>2</sup>-solid bars, and high density:  $1.03 \times 10^5$  cells/cm<sup>2</sup>-pattern bars. c. MCTS circularity in suspension (from Day 0 to Day 3). Low density:  $1.05 \times 10^2$  cells/cm<sup>2</sup>-solid bars, medium density:  $1.05 \times 10^3$  cells/cm<sup>2</sup>-pattern bars, and high density:  $1.05 \times 10^4$  cells/cm<sup>2</sup>-empty bars. AU565 breast (green), LNCaPcol prostate (blue), and SKOV-3 (red) cancer cell lines. Within each method, ANOVA followed by Tukey post-test was applied to individual cell lines separately for each seeding density. Cell line-seeding density combinations with a statistically significant difference between initial and final values are marked.

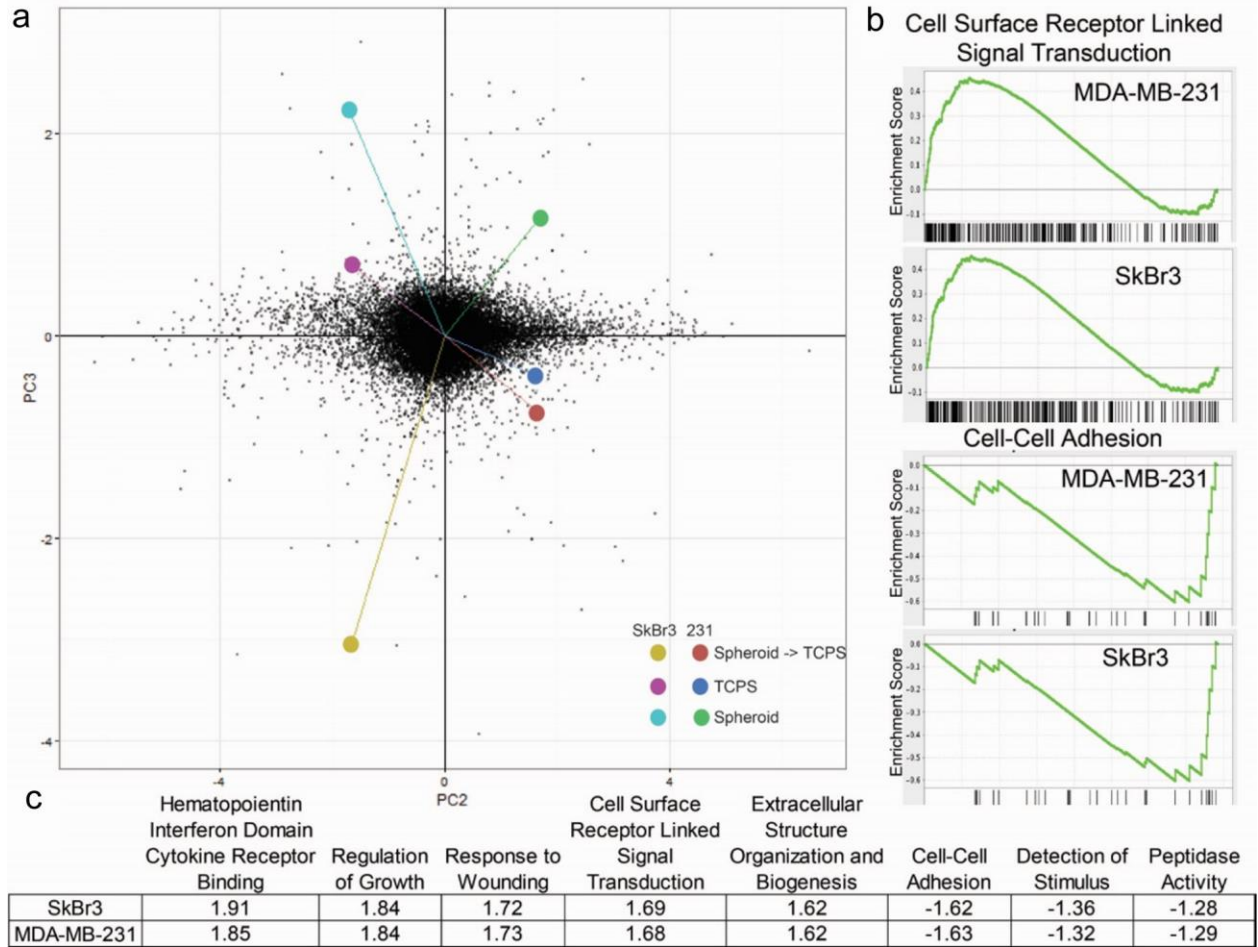

**Figure S10. RNA-Seq on breast cancer cells revealed enrichment of surface receptor linked signal transduction.**

a. Principal component analysis of MDA-MB-231 and SkBr3 grown on TCPS, in polyNIPAAM for 14 days, or grown in polyNIPAAM and then dissociated and plated back onto TCPS. b. Gene set enrichment analysis showed that cell surface receptor linked signal transduction was enriched on TCPS over MCTS, and cell-cell adhesion was enriched in MCTS as compared to TCPS, for MDA-MB-231 and SkBr3 cells. c. Several gene set categories were significantly enriched on TCPS (positive values) or in MCTS in 3D (negative values).

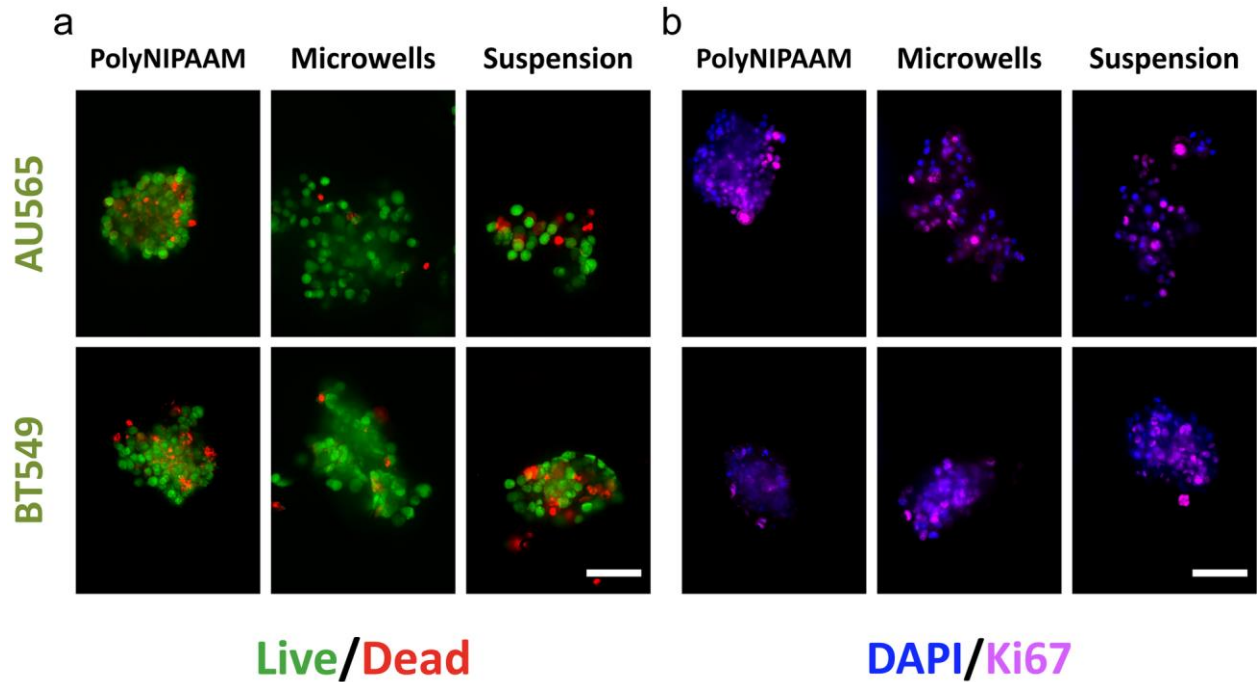

**Figure S11. MCTS formed in polyNIPAAAM, microwells, and suspension could be encapsulated in PEG-MAL.**

a. Live/dead staining of MCTS (green: live cells, red: dead cells) encapsulated in 10 wt% PEG-MAL hydrogels with cell adhesion peptide RGD. b. Ki67 staining of MCTS (purple: Ki67, blue: DAPI) encapsulated in 10 wt% PEG-MAL hydrogels with cell adhesion peptide RGD. Images for breast cancer (AU565 and BT549) cell lines are shown. Scale bar: 100  $\mu$ m.
